# Supplementary material for: Preparation and characterization of exfoliated graphene oxide–l-cystine as an effective adsorbent of Hg(ii) adsorption
Source: Royal Society of Chemistry journal article supplement (doi:10.1039/c4ra12564a), 2014-12-15
Supplement: c4ra12564a1.pdf [file c4ra12564a1.pdf]

## Supporting Information

### Preparation and characterization of exfoliated graphene oxide-L-cystine as an effective adsorbent of Hg(II) adsorption

A. Santhana Krishna Kumar<sup>a</sup>, Shih-Jen Jiang<sup>a,b\*</sup>

<sup>a</sup> Department of Chemistry, National Sun Yat-sen University, Kaohsiung 80424, Taiwan

<sup>b</sup> Department of Medical Laboratory Science and Biotechnology, Kaohsiung Medical University, Kaohsiung 80708, Taiwan. \*Corresponding author. Tel: +886-7-312-1101 ext. 2251

*E-mail address:* sjjiang@mail.nsysu.edu.tw (S.-J. Jiang).

---

#### Materials

The starting material, graphite used in the preparation of GO was procured from Sigma Aldrich. A stock solution of 1000 mg L<sup>-1</sup> Hg(II) solution was prepared using A. R. grade mercuric chloride and a working solution of 10 mg L<sup>-1</sup> for batch adsorption was prepared by appropriate dilution with Milli Q water, L-cystine was purchased from Fluka. The other required reagents were procured from Merck chemicals respectively.

#### Instruments and characterizations

Raman spectra were recorded on a WITec Confocal Raman Microscope Alpha 300R using a 532 nm He-Ne laser with 5 mW. Cross Polarization Magic Angle Spinning Nuclear Magnetic Resonance (<sup>13</sup>CPMAS-NMR) was analyzed Varian Innova Unity 500 MHz Solid State NMR Spectrometer by superconducting magnet 11.4 Tesla (Proton operating frequency : 500MHz). A Perkin Elmer Fourier Transform Infrared Spectroscopy (FT-IR) spectrum100 spectrometer was used to characterize the material functional groups identifications in the range 400–4000 cm<sup>-1</sup> by mixing 0.01g of the material with 0.1g KBr (spectroscopy grade). Kratos Axis Ultra X-ray Photoelectron

Spectroscopy (XPS) instruments were used to record samples, X-Ray Sources: 500 mm Rowland Circle Monochromator Al Mg/Al achromatic Source 450W max power. The spectra were recorded using a monochromatic Al K $\alpha$  X-ray source (15 mA, 14 KV). The pressure in the analyzer chamber was  $1 \times 10^{-8}$  Torr. The conditions applied for the survey scans includes an energy range 0-1200 eV and the survey spectra were collected at pass energy of 160 eV and a step size of 0.7 eV. High resolution spectra were collected using 40 eV pass energy, spot size of 300 x 700  $\mu\text{m}$  slot and 0.05 eV step size. Ultraviolet visible spectroscopy (UV-visible) was taken out by the use Jasco V-630 UV-visible spectrometer (Jasco, Japan). X-ray diffraction (Pwder-XRD) was carried out on a D8 Discover X-ray diffractometer with Cu Ka radiation ( $\lambda = 0.1541$  nm, Bruker, Germany) was utilized to record the characteristic changes in the diffraction pattern of the adsorbent material. A JEOL JSM-6330TF analyzer were used to observe the morphological changes scanning electron microscope(SEM) were recorded and the energy dispersive X-ray analysis spectrum (EDX) was recorded adsorbent and after the adsorption of Hg(II). The concentration of mercury in the aqueous solution was measured using inductively coupled plasma mass spectrometry (ICP-MS) Perkin-Elmer, Sciex- Elan DRC Plus, Software which we used Elan-6100 DRC PLUS respectively. The pH adjustments of the aqueous solutions were done using METTLER TOLEDO pH meter S20.

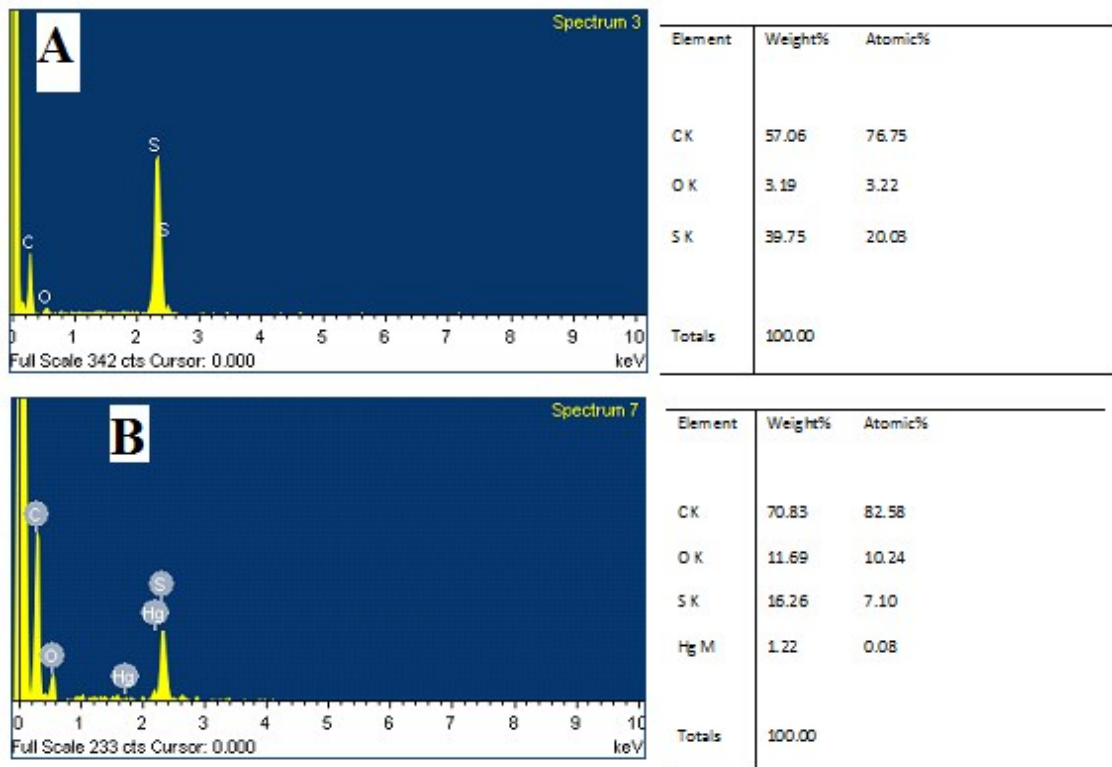

**Fig. S1.** EDX spectrum of the A) L-cysteine functionalized- EGO adsorbent (B) after adsorption of Hg(II) onto the adsorbent.

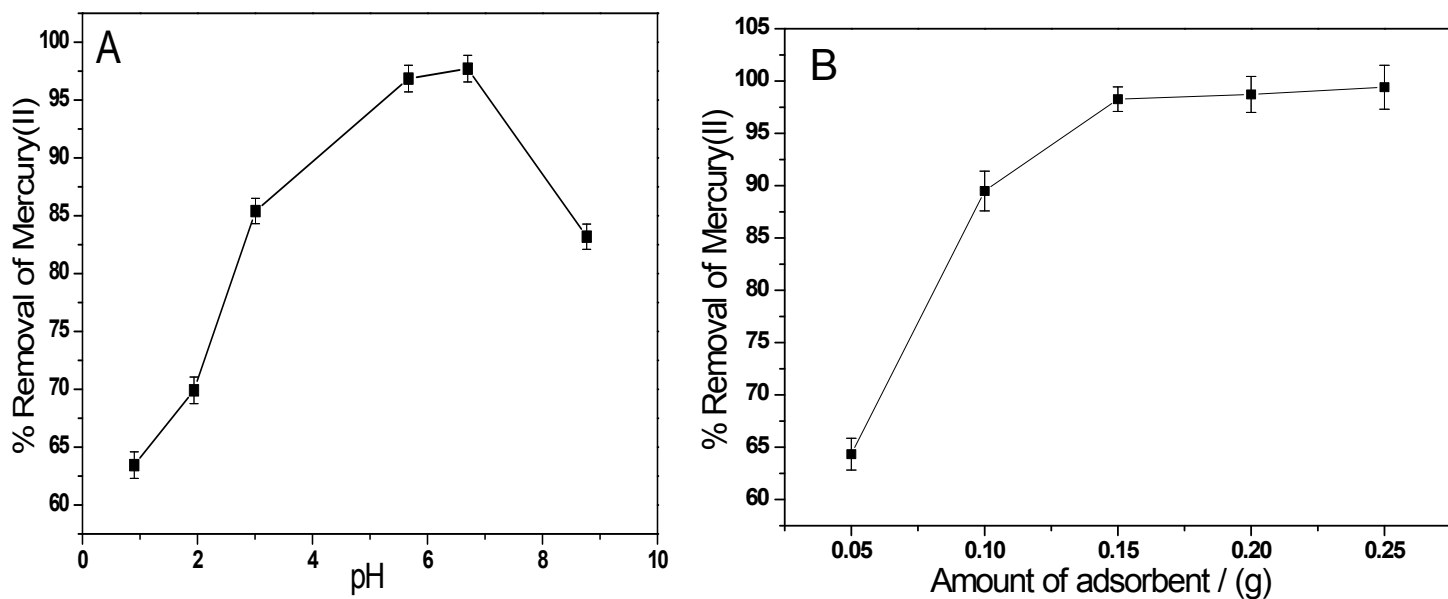

**Fig. S2A.** Effect of pH.

**B)** Amount of adsorbent

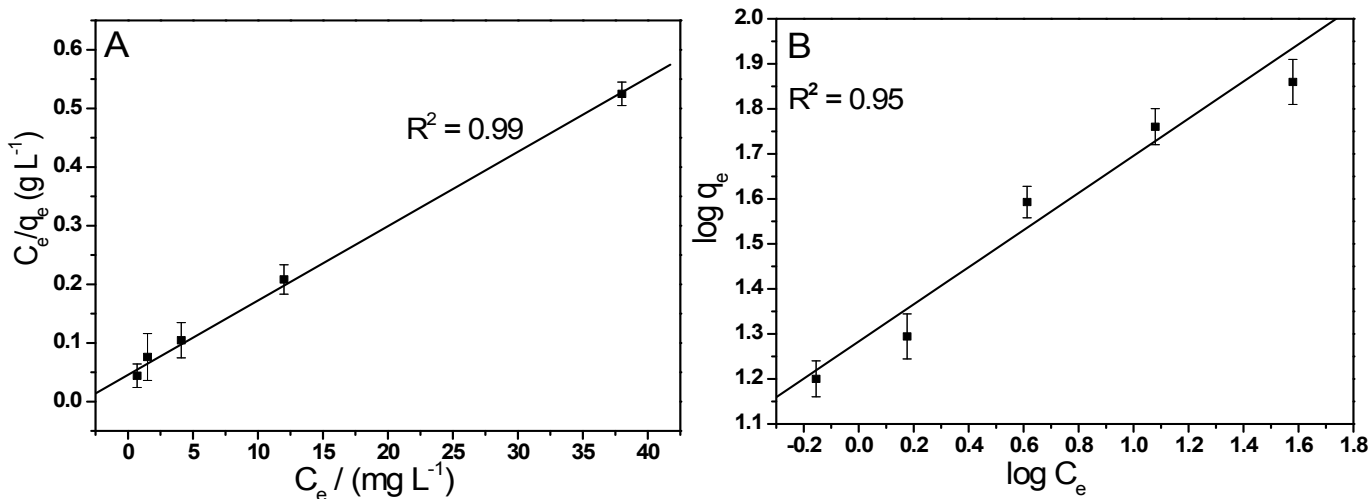

Fig. S3. A) Langmuir isotherm

B) Freundlich isotherm.

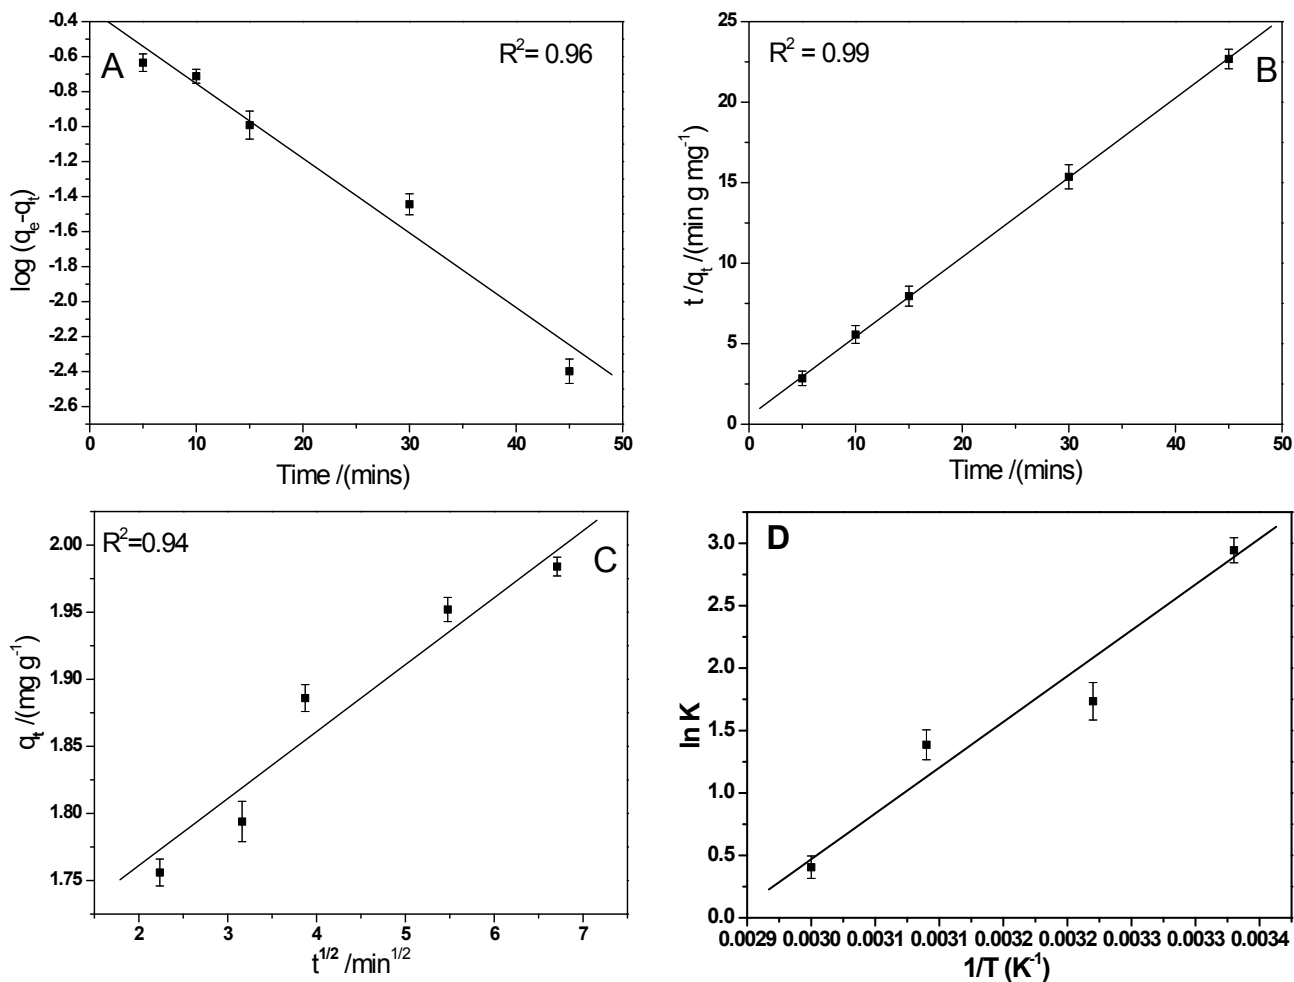

Fig. S4. Effect of (A) Pseudo first order kinetics (B) Pseudo second order kinetics (C) Variation of  $q_t$  against  $t^{1/2}$  (Weber-Morris) plot (D) Van't Hoff Plot.

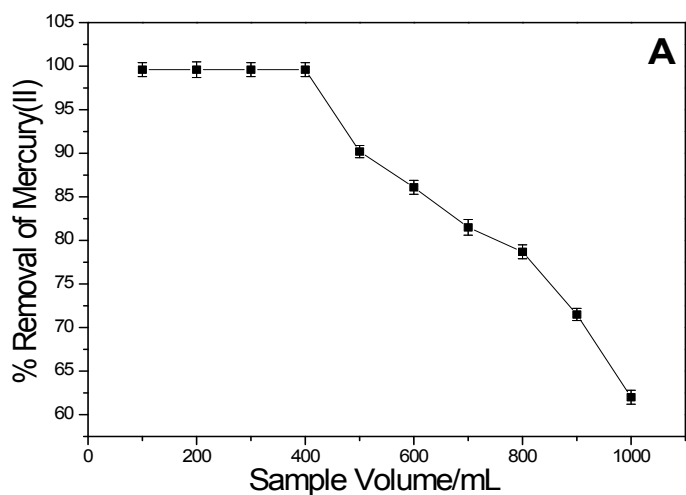

Fig. S5A Effect of sample volume

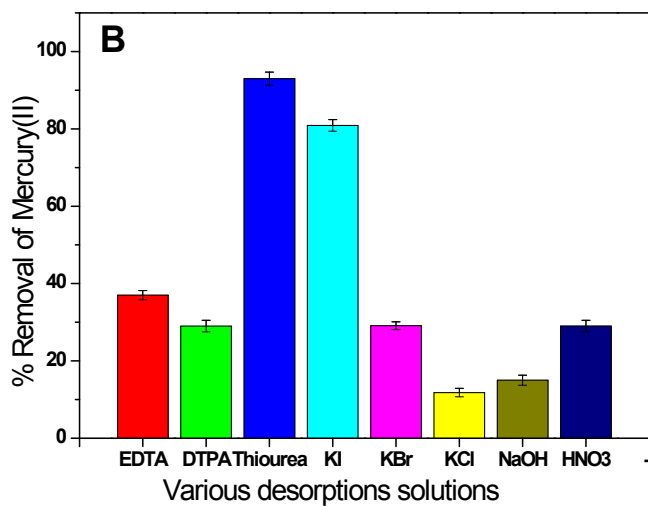

B) Effect of desorption studies.

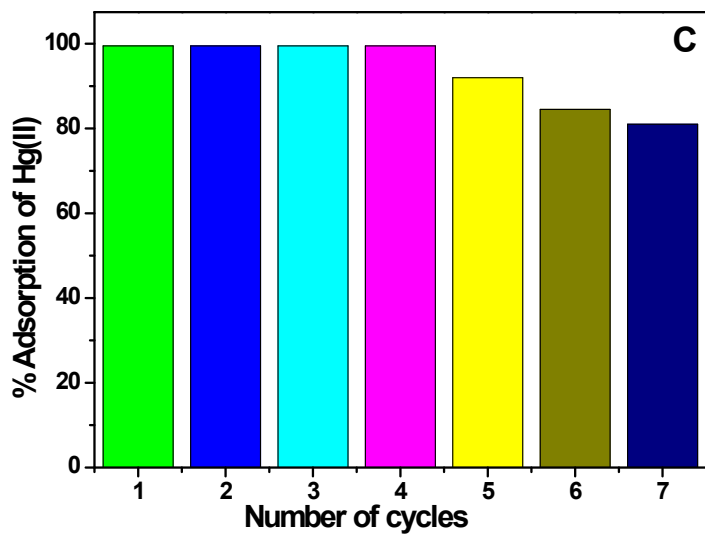

Fig. S5C Adsorbent regeneration cycles

**Table T1** Operating conditions of ICP-MS analysis

| Sl.No | ICP-MS plasma                    | Parameters                |
|-------|----------------------------------|---------------------------|
| 1     | RF power                         | 1300 W                    |
| 2     | Plasma gas (Ar) flow rate        | 15 L min <sup>-1</sup>    |
| 3     | Auxiliary gas (Ar) flow rate     | 1.325 L min <sup>-1</sup> |
| 4     | Carrier gas (Ar) flow rate       | 0.97 L min <sup>-1</sup>  |
| 5     | Sampler/skimmer diameter orifice | Nickel 1.0 mm/0.4 mm      |
| 6     | Data acquisition scanning mode   | Peak-hopping              |
| 7     | Dwell time                       | 50 ms                     |
| 8     | Points per spectral peak         | 1                         |
| 9     | Isotopes                         | <sup>202</sup> Hg         |
| 10    | Integration mode                 | Peak area                 |

**Table T2.**  $R_L$  values and type of equilibrium isotherms

| Sl.No | $R_L$ value   | Nature of equilibrium isotherm |
|-------|---------------|--------------------------------|
| 1     | $R_L > 1$     | Unfavorable                    |
| 2     | $R_L = 1$     | Linear                         |
| 3     | $0 < R_L < 1$ | Favorable                      |
| 4     | $R_L > 0$     | Irreversible                   |

**Table T3** Isotherm parameters acquired from various models

| Sl. No | Isotherm   | Characteristic values                                         |       |
|--------|------------|---------------------------------------------------------------|-------|
| 1      | Langmuir   | $q_0$ (mg g <sup>-1</sup> )                                   | 79.36 |
|        |            | $b$ (L mg <sup>-1</sup> )                                     | 0.27  |
|        |            | $R_L$                                                         | 0.034 |
|        |            | $r^2$                                                         | 0.99  |
| 2      | Freundlich | $K_F$ (mg <sup>1-1/n</sup> g <sup>-1</sup> L <sup>1/n</sup> ) | 19.1  |
|        |            | $n$                                                           | 2.42  |
|        |            | $r^2$                                                         | 0.95  |

**Table T4** Adsorption kinetics

| Rate constant<br>$k_2$ /(g mg <sup>-1</sup> min <sup>-1</sup> ) | Regression<br>coefficient | Rate constant $k_1$ /<br>(min <sup>-1</sup> ) | Regression<br>coefficient | Intraparticle rate constant<br>$k_{int}$ /(mg g <sup>-1</sup> min <sup>-1/2</sup> ) |
|-----------------------------------------------------------------|---------------------------|-----------------------------------------------|---------------------------|-------------------------------------------------------------------------------------|
| 0.50                                                            | 0.99                      | 0.067                                         | 0.96                      | 0.049                                                                               |

**Table T5.** Thermodynamic parameters

| Temperature/<br>(Kelvin) | $q_e$ (mg g <sup>-1</sup> ) | $\Delta G^0$ / (kJ mol <sup>-1</sup> ) | $\Delta S^0$ / (J mol <sup>-1</sup> K <sup>-1</sup> ) | $\Delta H^0$ / (kJ mol <sup>-1</sup> ) |
|--------------------------|-----------------------------|----------------------------------------|-------------------------------------------------------|----------------------------------------|
| 300                      | 1.9                         | -7.34                                  | -179.08                                               | -60.99                                 |
| 310                      | 1.7                         | -4.47                                  |                                                       |                                        |
| 323                      | 1.6                         | -3.72                                  |                                                       |                                        |
| 333                      | 1.2                         | -1.12                                  |                                                       |                                        |



**Table T6** Effect of co-existing ions

| Sample name           | Co-existing ions                                                                                               | Concentration in mg L <sup>-1</sup> | (%) Removal of Hg(II) |
|-----------------------|----------------------------------------------------------------------------------------------------------------|-------------------------------------|-----------------------|
| Synthetic mixture - A | Ag, Al, As, Ba, Bi, Ca, Cd, Co, Cr, Cs, Cu, Ga, In, K, Li, Mg, Mn, Na, Ni, Pb, Rb, Se, Sr, Ti, U, V, Zn        | 10                                  | 80.0                  |
| Synthetic mixture - B | As, Cd, Co, Cu, Ni, Pb, Se, Zn, Au                                                                             | 100                                 | 91.0                  |
| Synthetic mixture -C  | SO <sub>4</sub> <sup>2-</sup> , NO <sub>3</sub> <sup>-</sup> , PO <sub>4</sub> <sup>3-</sup> , Cl <sup>-</sup> | 100                                 | 90.0                  |
